# Supplementary material for: A split G-quadruplex DNAzyme based magnetic graphene oxide platform for sensitive authentication of Pseudostellaria heterophylla
Source: Royal Society of Chemistry journal article supplement (doi:10.1039/c6ra16220g), 2016-01-01
Supplement: c6ra16220g1.pdf [file c6ra16220g1.pdf]

*Electronic Supplementary Information (ESI) for RSC Advances*

**A split G-quadruplex DNzyme based magnetic graphene oxide platform for sensitive authentication of *Pseudostellaria heterophylla***

Zhen Zhu Zheng,<sup>a,b</sup> Juan Hu<sup>b,c\*</sup>

<sup>a</sup>Fujian Quanzhou Children's Hospital, Quanzhou 362000, China

<sup>b</sup>Fujian Academy of Traditional Chinese Medicine, Fuzhou 350003, China

<sup>c</sup>Fujian University of Traditional Chinese Medicine, Fuzhou 350122, China

\*Corresponding author: Tel.: 86-0591-83570397, E-mail address: [huj@fjtcn.edu.cn](mailto:huj@fjtcn.edu.cn)

## **EXPERIMENTAL**

### **Preparation of graphene oxide**

Graphene oxide was prepared from natural graphite powder by a modified Hummers method.<sup>1,2</sup> 0.5 g of graphite powder was initially mixed with 23 mL of H<sub>2</sub>SO<sub>4</sub> (98%) at 0 °C, and then 0.5 g of NaNO<sub>3</sub> and 3 g of KMnO<sub>4</sub> were dropwise added. The well-mixed solution was stirred in a water bath at 35 °C for 1 h. Successively, 140 mL of H<sub>2</sub>O was added in the mixture, and the temperature was raised to 90 °C. Following that, 3 mL of H<sub>2</sub>O<sub>2</sub> (30%) was added and the color of the mixture turned to light brown. At last, the mixture was repeated washed with 1:10 HCl aqueous solution and then H<sub>2</sub>O. The resultant dispersion was sonicated under ambient condition for 4 h and centrifuged to obtain exfoliated graphene oxide.

### **Synthesis of magnetic graphene oxide**

Graphene oxide nanoparticles coated with Fe<sub>3</sub>O<sub>4</sub> were synthesized according to the literature with some modification.<sup>3</sup> To prepare 10 mg mL<sup>-1</sup> NaOH/DEG stock solution,

200 mg NaOH was firstly added into 20 mL DEG, then the mixture was heated for 1 h at a 120 °C oil bath under the protection of N<sub>2</sub>, and then allowed to cool to 70 °C. After that, 15 mg graphene oxide and 60 mg FeCl<sub>3</sub> were added into 10 mL of the NaOH/DEG solution. The mixture was stirred for 1 h at room temperature, and then transferred to a 220 °C oil bath for 30 min under N<sub>2</sub>. Following that, 5 mL NaOH/DEG stock solution at 70 °C was added rapidly into the above 220 °C mixture, and then heated for another 1 h. Consequently, the product was washed with ethanol and centrifuged several times to obtain Fe<sub>3</sub>O<sub>4</sub>/GO composites.

Table S1. Sequences of Oligomers used in the G-quadruplex DNAzyme based Fe<sub>3</sub>O<sub>4</sub>/GO platform

| oligomer | Sequence (From 5' to 3')                            |
|----------|-----------------------------------------------------|
| probe a  | GGGTTGGGCAGGTTTCGACAATGATCCTTCCGCAG                 |
| probe b  | CGCTGGTCGTTCTGCTGGGCTGGGTAGGG                       |
| T-DNA    | CTGCGGAAGGATCATTGTCGAAACCTGCCCAGCAGAACGACCAGCG      |
| JSYX     | CTGCGGAAGGATCATTGTCGAAACTGCCCAGCAGAACGACCAGCG       |
| JSNJ     | CTGCGGAAGGATCATTGTCCAATACTGGCCAGCAGAACGGACCAGC<br>G |
| JSZJ     | TGCGGAAGGATCATTGTCAAACCTGGCCAGCAGAACGACCAGCG        |
| AHCZ     | CTGCGGAAGGATCATTGTCGAAACCTGCCCAGCTGAACGACCAGCG      |
| AHXC     | CTGCGGAAGGATCATTGTCGAAACTGCCCAGACAGAACGACCAGCG      |

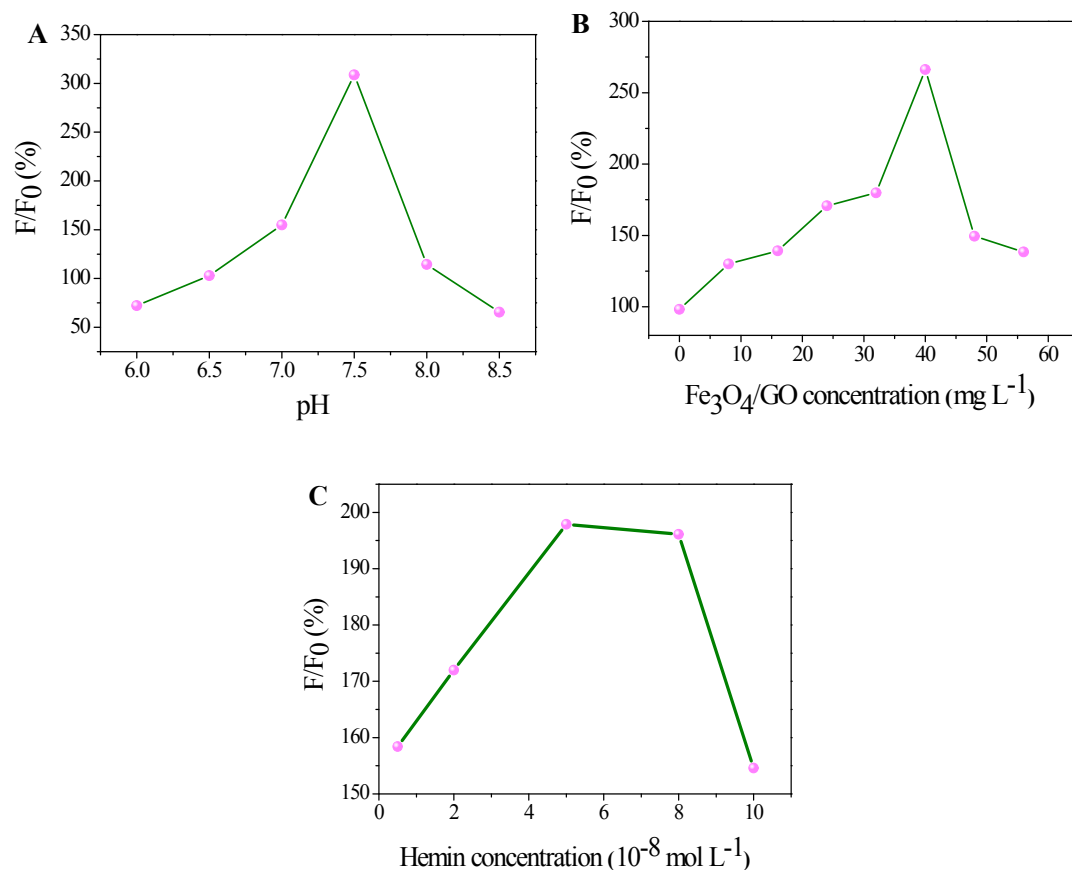

Fig. S1 (A)  $F/F_0$  versus pH from 6.0 to 8.5; (B)  $F/F_0$  versus  $\text{Fe}_3\text{O}_4/\text{GO}$  concentration from 0 to 56  $\text{mg L}^{-1}$ ; (C)  $F/F_0$  versus hemin concentration from  $5.0 \times 10^{-9}$  to  $1.0 \times 10^{-7}$   $\text{mol L}^{-1}$ ;  $F_0$  is the fluorescence intensity in the absence of T-DNA,  $F$  is the fluorescence intensity in the presence of  $3.0 \times 10^{-8}$   $\text{mol L}^{-1}$  T-DNA. The other conditions are the same as those in Section 2.3.

## References

1. W. S. Hummers and R. E. Offeman, *J. Am. Chem. Soc.*, 1958, **80**, 1339.
2. B. Zhang, Y. L. Cui, H. F. Chen, B. Q. Liu, G. N. Chen, D. P. Tang, *Electroanalysis*, 2011, **23**, 1821-1829.
3. D. P. Tang, J. Tang, Q. F. Li, B. L. Su, G. N. Chen, *Anal. Chem.*, 2011, **83**, 7255-7259.
